# Supplementary material
Source: Springer Nature journal article supplement (https://www.springermedizin.de/resource/supplementary/12913_2012_2672_MOESM1_ESM.pdf/9531090)
Supplement: MOESM1 [file 9531090]

**Brainstorming  
(n=90)**

**Sorting (n=46) and  
Rating (n=69) of 64  
statements**

**Interpretation  
(n=35)**

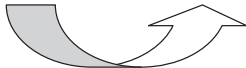

*Consolidation of 371 statements*

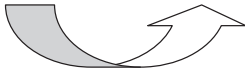

*Multidimensional scaling &  
Hierarchical cluster analysis*
